# Supplementary material for: Head and neck radiotherapy on the MR linac: a multicenter planning challenge amongst MRIdian platform users
Source: Springer Nature journal article supplement (doi:10.1007/s00066-021-01771-8), 2021-04-23

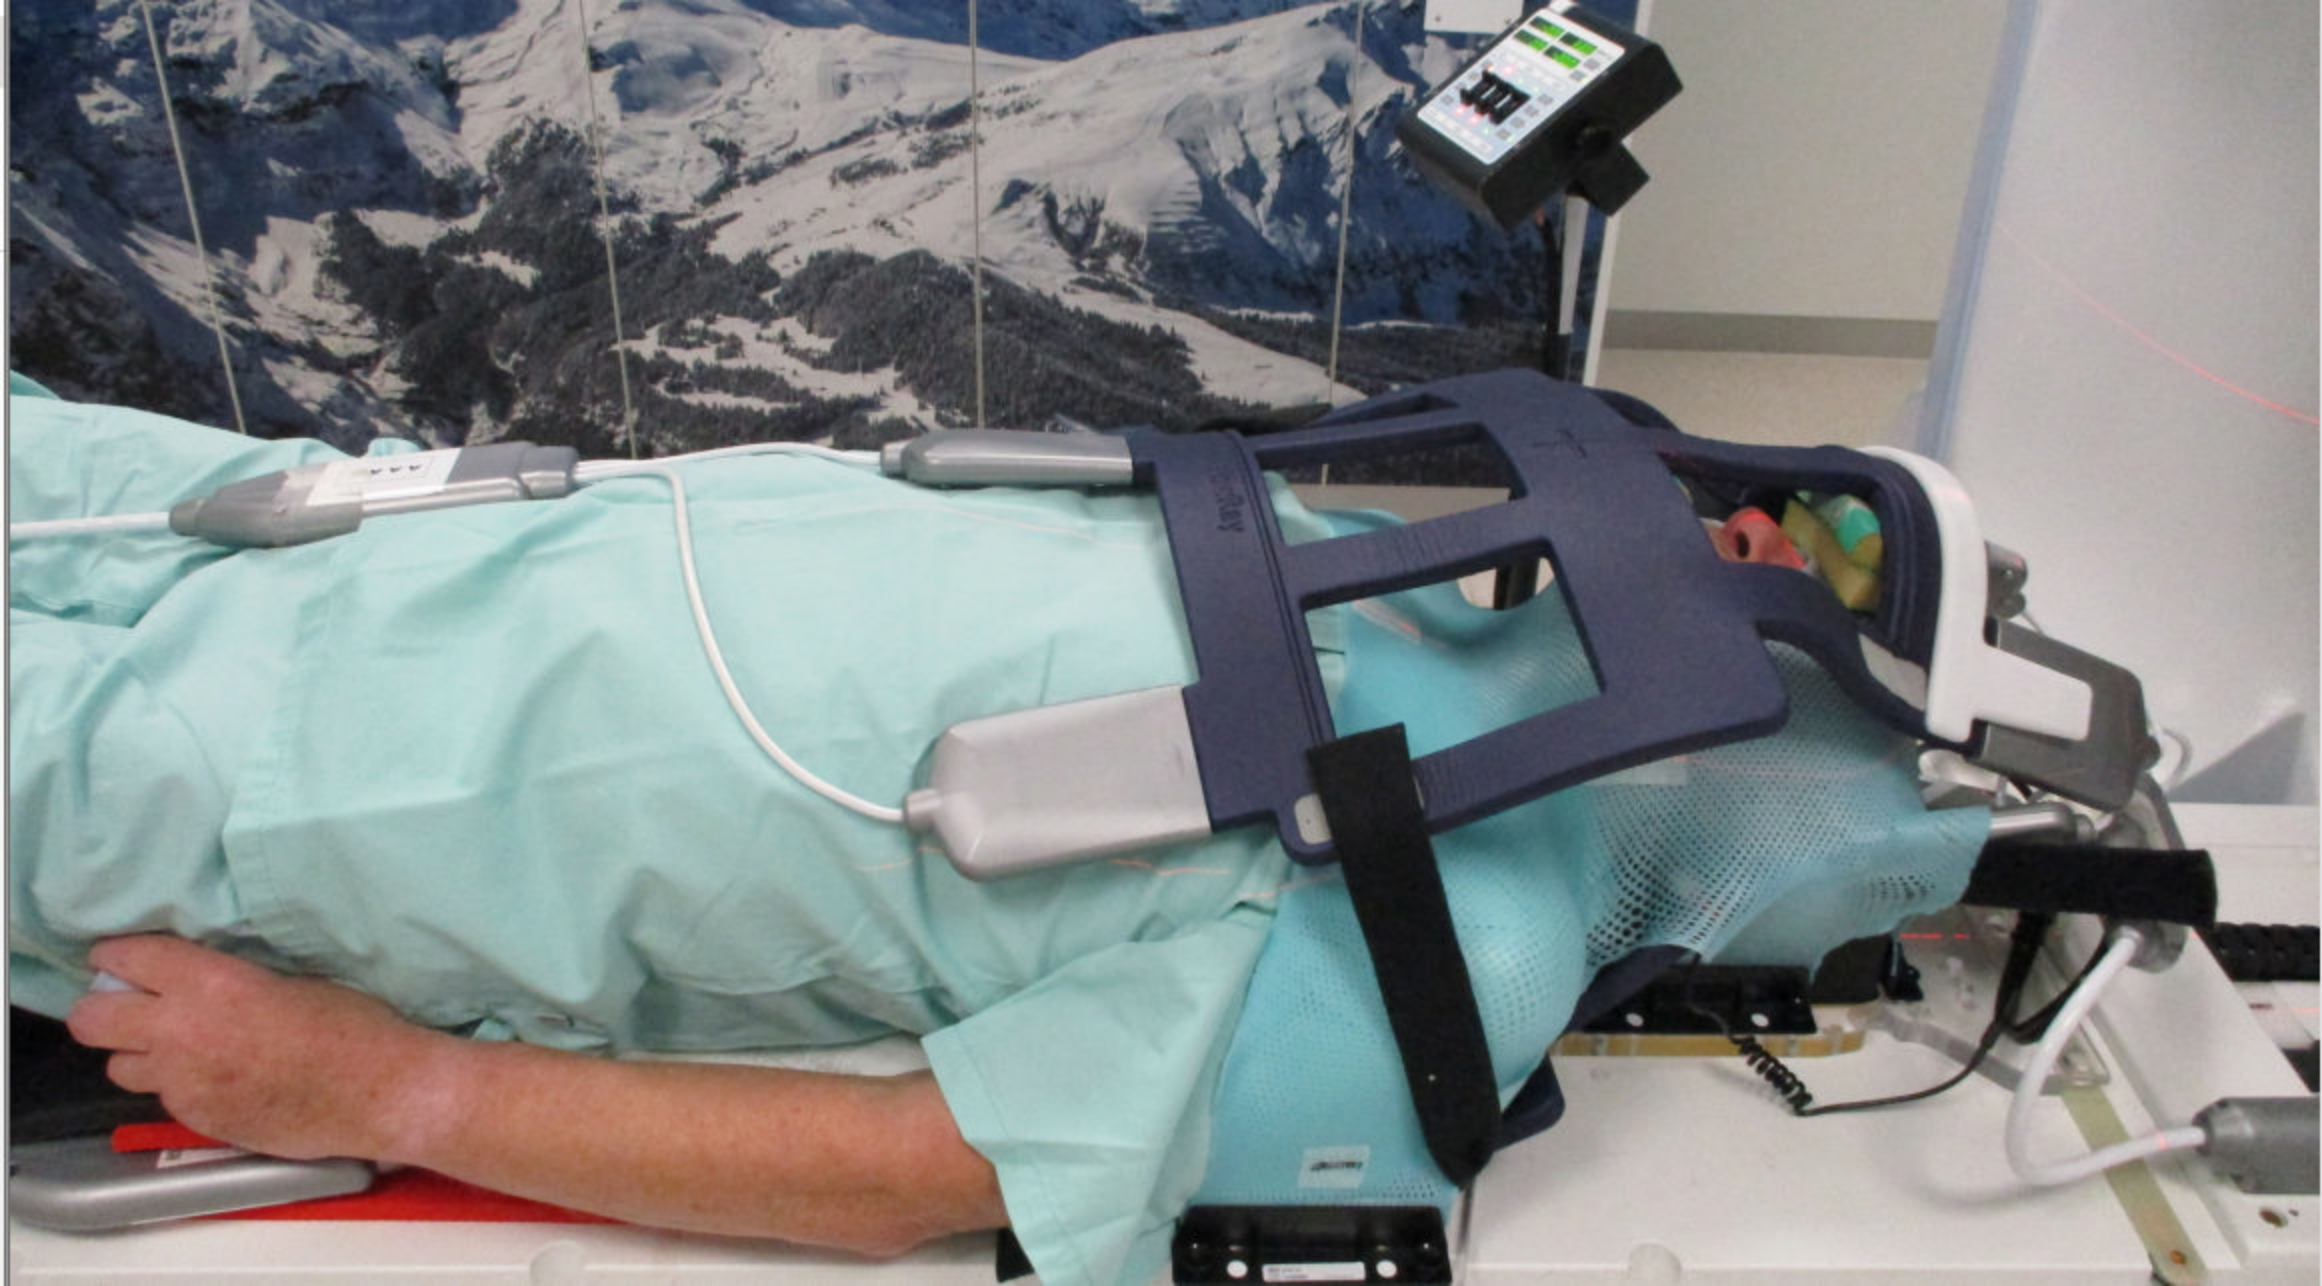

Supplement: MOESM1 [file 19099454]
